# Supplementary material
Source: PubMed Central journal article supplement (PMC2397374)
Supplement: 107.125542_2.pdf [file 107.125542_2.pdf]

### Membrane Height Profile

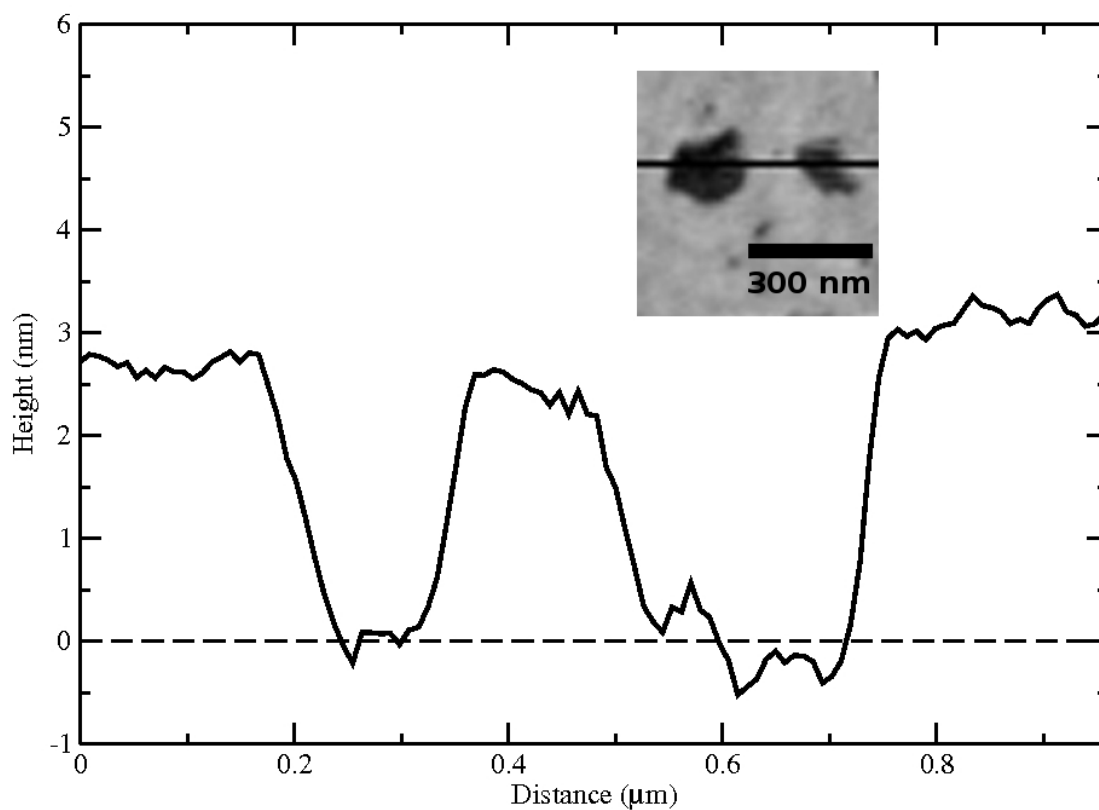

**Figure S2.** Height profile from atomic force microscopy (AFM) of a 99 mol% TDM supported monolayer, measured along the line shown in the inset image. Holes were generated by cooling from 35 °C to room temperature (22 °C); the membrane appears as plateaus of height  $\approx 2.7$  nm relative to voids.
